# Supplementary figures and images for: Global Status of Research on Lateral Lymph Nodes in Rectal Cancer from 1994 to 2022: A Bibliometric Analysis
Source: MDPI journal article supplement (doi:10.3390/healthcare11101362), 2023-05-09

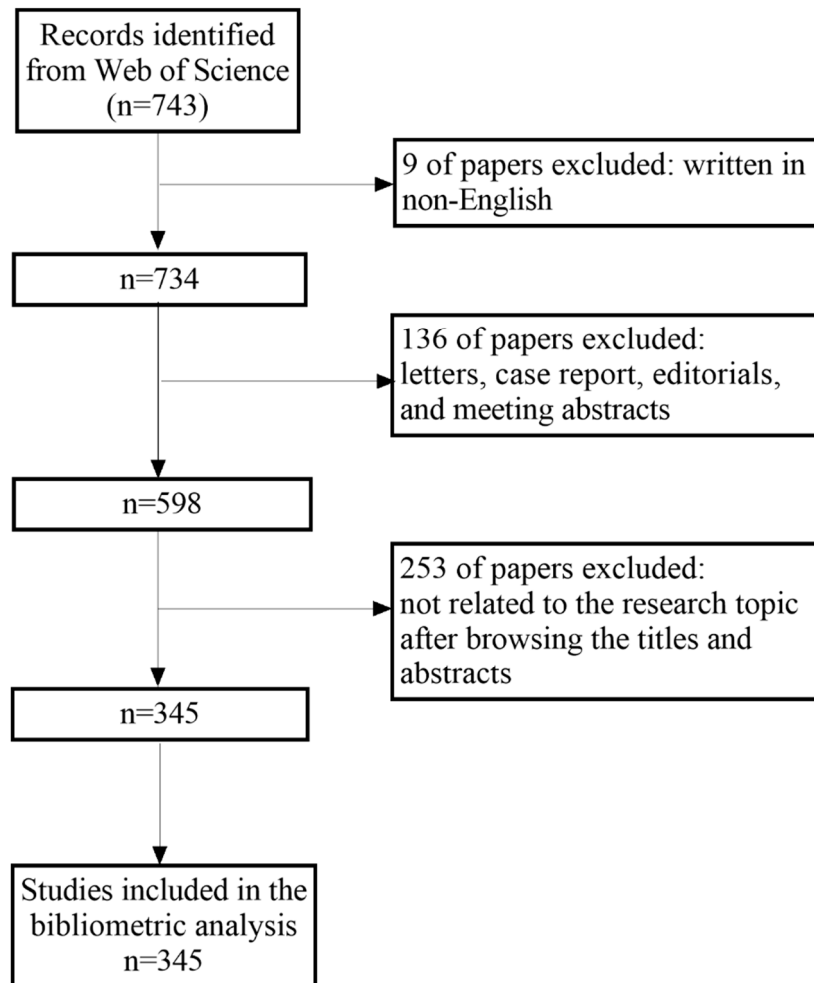

Figure S1. Flowchart of the selection process.

Supplement: s1 [file s1]
